## Prevalence of near-death experiences and REM sleep intrusion in 1034 adults from 35 countries

Daniel Kondziella<sup>1,2,3</sup>, Markus Harboe Olsen<sup>4</sup>

<sup>1</sup>Department of Neurology, Rigshospitalet, Copenhagen University Hospital, Copenhagen, Denmark

<sup>2</sup>Faculty of Health and Medical Sciences, Copenhagen University, Copenhagen, Denmark

<sup>3</sup>Department of Neuroscience, Norwegian University of Science and Technology, Trondheim, Norway

<sup>4</sup>Department of Neuroanesthesiology, Copenhagen University Hospital Rigshospitalet, Copenhagen, Denmark

\* Corresponding author: Daniel Kondziella, MD, MSc, dr.philos., FEBN  
Department of Neurology,  
Rigshospitalet, Copenhagen University Hospital  
Blegdamsvej 9  
DK-2100 Copenhagen  
daniel\_kondziella@yahoo.com  
+45 60 13 11 00

Manuscript type: Original paper

Running title: Near-death experience and REM sleep intrusion in adults

Word count: 2436 (abstract 234); Tables: 6, Figures: 2, References: 20

Keywords: Brain injury, cataplexy, cardiac arrest, coma, consciousness, disorders of consciousness, drowning, intensive care, out-of-body experience, rapid eye movement sleep

**Conflict of interests:** *The authors have no conflict of interests to declare*

**Financial disclosures:** *The authors have no financial disclosures*

**Funding:** *None*

**Author contribution:** *DK - study concept, acquisition of data, analysis and interpretation, writing of the manuscript, critical revision for important intellectual content, and approval of final manuscript. MHO - analysis and interpretation, critical revision for important intellectual content, and approval of final manuscript.*

**Ethics:** *The Ethics Committee of the Capital Region of Denmark waives approval for online surveys (Section 14 (1) of the Committee Act. 2; <http://www.nvk.dk/english>).*

**Trial registration:** This study was pre-registered, including all hypotheses, with the Open Science Framework (<https://osf.io/ykr3g>)

## ABSTRACT

**Background:** Near-death experiences have fascinated humans for centuries, but their origin and prevalence remain unknown.

**Methods:** Using an online crowdsourcing platform, we recruited 1034 lay people from 35 countries to investigate the prevalence of near-death experiences and self-reported REM sleep intrusion. Reports were validated using the Greyson Near-Death Experiences Scale (GNDES) with a score of  $\geq 7$  as cut-off point for identifying near-death experiences.

**Results:** Near-death experiences were reported by 106 of 1034 participants (10%; CI 95% 8.5-12%). REM sleep intrusion was more common in people with near-death experiences ( $n=50/106$ ; 47%) than in people with experiences with 6 points or less on the GNDES ( $n=47/183$ ; 26%) or in those without any such experience ( $n=107/744$ ; 14%;  $p<0.0001$ ). Following multivariate regression analysis to adjust for age, gender, place of origin, employment status and perceived danger, this association remained highly significant; people with REM sleep intrusion were more likely to exhibit near-death experiences than those without REM sleep abnormalities (odds ratio 2.85; CI 95% 1.68-4.88;  $p=0.0001$ ).

**Conclusions:** The prevalence of near-death experiences in the public is around 10%. While age, gender, place of residence, employment status and perceived threat do not seem to influence the prevalence of near-death experiences, there is a significant association with REM sleep intrusion. This finding is in line with the view that despite imminent threat to life, brain physiology must be well-preserved to perceive these fascinating experiences and store them as long-term memories.

## INTRODUCTION

Near-death experiences can be defined as extraordinary conscious perceptual experiences, including emotional, self-related, spiritual and mystical experiences, occurring in a person close to death or in situations of imminent physical or emotional threat.<sup>1</sup> Reports of near-death experiences include, but are not limited to, increased speed of thoughts, distortion of time perception, out-of-body experiences, and visual and auditive hallucinations.<sup>1-3</sup>

Although near-death experiences have fascinated humans for centuries, it remains unknown how prevalent they are and what causes them. However, these experiences share phenotypical features with those made during rapid eye movement (REM) sleep (**Table 1**).<sup>4</sup> Here, we recruited a large multinational sample of lay people from a crowdsourcing platform to estimate the prevalence of near-death experiences and to test the hypothesis that these experiences are associated with a propensity for REM sleep intrusion.

## METHODS

### Hypotheses and research questions

The objectives of this study were two-fold.

- Primary objective: To estimate the frequency of near-death experiences and REM sleep intrusions reported in a large sample of adult humans collected from an online crowdsourcing service.
- Secondary objective: To test the hypothesis that people who report a near-death experience have a greater frequency of REM sleep intrusions.

### Study design

An online platform, Prolific Academic (<https://prolific.ac/>), was used to recruit a large global sample of lay people. Prolific Academic is a crowdsourcing online platform to recruit human subjects for research that compares favorably with Amazon's Mechanical Turk in terms of honesty and diversity of participants and data quality.<sup>5,6</sup> Participants were recruited without any filters except for English language and age  $\geq 18$  years.

We asked participants to complete a questionnaire comprising demographic information on age, gender, employment status and place of residence, followed by 4 questions about REM sleep intrusion. Participants were then asked if they ever had had a near-death experience. If not, the survey ended here; if yes, we continued to inquire about this experience in detail, including all 16 items of the Greyson Near-Death Experience Scale (GNDES), the most widely used standardized tool to identify, confirm and characterize near-death experiences in research.<sup>1</sup> In addition to multiple choice answers, participants were given the possibility to describe their experience in their own words. Prior to the start of the survey, participants were instructed that their monetary reward was fixed (see below), regardless of whether they would report having had a near-death experience or not. See **Table 1** for details.

### Statistics

We estimated the number of participants required to be 384, using a very high population size (300.000.000), a confidence level of 95% and a margin of error of 5%. However, as previous studies have estimated that 5-15% of the population have had a near-death experience,<sup>7-9</sup> we decided to enroll ca. 1000 participants to identify an estimated 50-100 near-death experiences.

Data were analyzed using R (R 3.4.1, R Development Core Team [2008], Vienna, Austria). Categorical variables were analyzed using a chi-squared test. Continuous variables were compared using Student's t-tests. We calculated odds ratios for having near-death experiences with or without co-occurrence of REM sleep intrusion and performed multivariate logistic regression analysis to correct for age, gender, employment status, place of residence, and whether the situation in which an experience was made was perceived as life-threatening or not. To adjust for multiple testing, the alpha level was set at 0.01.

To prevent HARKing (Hypothesizing After the Results are Known),<sup>10</sup> we pre-registered the study, including all objectives, with the Open Science Framework (<https://osf.io/ykr3g>).

## Ethics

Participants gave consent for publication of their (anonymous) data. Participation was anonymous, voluntary and restricted to those  $\geq 18$  years. Participants received a monetary reward upon completion of the survey, following the platform's ethical rewards principle ( $\geq \$6.50/h$ ). The Ethics Committee of the Capital Region of Denmark waives approval for online surveys (Section 14 (1) of the Committee Act. 2; <http://www.nvk.dk/english>).

## RESULTS

We recruited 1034 lay people from 35 countries (mean age 32.7 years, SD 11.3 years; 59% female; 79% fully or part-time employed or in training), most of which were residing in Europe and North America. **Table 2** and **Figure 1** provide epidemiological information.

### *Near-death experiences: Prevalence and semiology*

Two-hundred eighty-nine participants (28%; CI 95% 25-31%) claimed to have had a near-death experience, 106 of which reached the threshold of 7 points or more on the GNDES (37%; CI 95% 31-43%). Thus, confirmed near-death experiences were reported by 106 of 1034 participants (10%; CI 95% 8.5-12%) (**Figure 2**).

Participants perceived the situation in which they had their experience slightly more often as truly life-threatening ( $n=158$ ; 55%) than not truly life-threatening ( $n=131$ ; 45%), and this was irrespective of whether their experience met criteria for a near-death experience according to the GNDES or not ( $p=0.55$ ; **Table 3**).

Near-death experiences and experiences with  $\leq 6$  points on the GNDES occurred in the following situations, listed with decreasing frequency: motor accident 26% ( $n=77$ ), near-drowning 19% ( $n=56$ ); intense grief or anxiety 17.5% ( $n=51$ ), substance abuse 11.5% ( $n=33$ ); psychological distress without organic disease 9.5% ( $n=28$ ); physical violence other than combat 8% ( $n=24$ ), critical illness 8% ( $n=23$ ); childbirth complication 8% ( $n=23$ ); suicide attempt 7% ( $n=20$ ); anesthesia/medical procedure 7% ( $n=20$ ); cardiac arrest/heart attack 5.5% ( $n=16$ ); meditation or prayer 5% ( $n=15$ ); anaphylactic reaction 5% ( $n=14$ ); combat situation 4% ( $n=11$ ); syncope 2% ( $n=5$ ); epileptic seizure 1.5% ( $n=4$ ); and other 19% ( $n=56$ ).

The most often reported symptoms were abnormal time perception (faster or slower than normal; reported by 252 participants; 87%); exceptional speed of thoughts ( $n=189$ ; 65%); exceptional vivid senses ( $n=182$ ; 63%); and feeling separated from one's body, including out-of-body experiences ( $n=152$ ; 52%).

Experiences that qualified as a true near-death experience according to the GNDES were perceived much more often as pleasant (n=41; 53%) than experiences that did not (n=21; 14%;  $p < 0.0001$ ; neutral experience excluded; **Table 3**).

Around one third of participants reporting a near-death experience or near-death-like experience stated having had two or three such experiences (n=92, 32%); and some even claimed to have had more than three (n=10; 3.5%).

### ***Near-death experiences and evidence for REM sleep intrusion***

Evidence for REM sleep intrusion was much more common in people with experiences above the cut-off point of the Greyson Near-Death Experience Scale (n=50/106; 47%) than in people with experiences below this threshold (n=47/183; 26%) or in those without any such experience (n=107/744; 14%;  $p < 0.0001$ ; **Tables 2 and 3**). Following multivariate regression analysis to adjust for age, gender, place of origin, employment status and perceived danger, this association remained highly significant; i.e. people with REM sleep intrusion were more likely to exhibit near-death experiences than those without REM sleep abnormalities (odds ratio 2.85; CI 95% 1.68-4.88;  $p = 0.0001$ ; **Table 4**).

Selected written reports from participants can be found in **Tables 5 and 6**. Raw data are provided in the *online supplemental files*.

## **DISCUSSION**

Using crowdsourcing methods, we have shown that 1 out of 10 people from a large sample of 35 countries have had a confirmed near-death experience (10%; CI 95% 8.5-12%). This estimate is slightly higher than what was reported in three previous studies using traditional interview-based surveys in the US (5%)<sup>7</sup>, Australia (8%)<sup>9</sup> and Germany (4%)<sup>8</sup>; of note, none of those studies validated reports with the GNDES. Experiences that did not fulfill criteria for a near-death experience were roughly twice as common.

Similar to previous reports, we found that near-death experiences occur in various cultures and nationalities and irrespective of employment status, age and gender.<sup>2,3,11-13</sup> However, unlike previous reports in which near-death experiences were almost always associated with peacefulness and well-being,<sup>2,3,11-13</sup> we found a much higher rate of people stating that their experience was indeed unpleasant. Although experiences with a cut-off score of at least 7 points on the GNDES were more often pleasant (53%) than experiences with a lower score (14%;  $p < 0.0001$ ), almost half of all near-death experiences were labelled as stressful. We believe this is a much more realistic picture. The discrepancy between the present and previous studies is likely due to methodological limitations of the GNDES that addresses only pleasant feelings but does not, in contrast to our questionnaire, record negative emotions.<sup>1</sup>

Also unlike previous studies,<sup>2,3,11-13</sup> we found that near-death experiences occurred equally likely in truly life-threatening situations and situations that only just felt so. Again, we think this reflects a more representative picture, since our study, in contrast to most others, draws inferences from a large cross-sectional sample of unprimed lay people and not from retrospective or prospective observations in specific populations such as cardiac arrest survivors.<sup>3,14</sup> Still, these data substantiate previous reasoning<sup>12</sup> that near-death experiences are real experiences and not merely products of fantasy proneness: People with confirmed near-death experiences did not perceive their situations as more dangerous than those without such experiences which argues against tendencies towards overdramatizing.

The most important finding, however, is the association of near-death experiences with REM sleep intrusion. Following multivariate analysis, REM sleep intrusion was the only factor that remained significantly correlated with near-death experiences (and indeed very much so:  $p=0.0001$ ). This finding corroborates and extends data from a previous case-control study, in which Nelson and co-workers assessed the life-time prevalence of REM sleep intrusion in 55 humans with near-death experiences compared with that in age- and sex-matched controls. Sleep-related visual and auditory hallucinations and sleep paralysis assessed by a questionnaire akin to that used in our study were substantially more common in cases with a near-death experience. The authors concluded that under circumstances of peril, near-death experiences are more likely in people with a tendency towards REM sleep intrusion and that REM sleep intrusion might explain much, if not all, of the semiology of these experiences. Indeed, as shown in **Table 5**, two participants from our study gave spontaneous reports of classic REM sleep disturbances (rather than reporting their near-death experience as requested) akin to those seen in people with narcolepsy.<sup>15,16</sup>

From a biological perspective, REM sleep intrusion as an explanation for near-death experiences appears to make sense. Recent observations into the physiology of the dying human brain are very noteworthy in this regard.<sup>17,18</sup> Dreier and co-workers from the COSBID group (Co-Operative Studies on Brain Injury Depolarizations) performed recordings with subdural electrode strips or intraparenchymal electrode arrays in 9 patients with devastating brain injury and a Do Not Resuscitate-Comfort Care order. Following terminal extubation, the authors noted a decline in brain tissue partial pressure of oxygen and circulatory arrest. Of note, silencing of spontaneous cortical electrical activity developed simultaneously across regional electrode arrays in 8 patients. As suggested by the authors, “isoelectricity of brain activity develops as neurons hyperpolarize to reduce energy consumption as a final survival strategy”.<sup>18</sup> This silencing, which the authors term nonspreading depression, was trailed by terminal spreading depolarizations starting to propagate between electrodes 2 to 6 minutes after onset of the final drop in cerebral perfusion and between 15 seconds and 4.5 minutes after nonspreading depression.<sup>18</sup>

Metaphysical speculations omitted, this state of cortical dying seems incompatible with preserved function of hippocampi and large-scale memory networks that is mandatory for the formation and storage of elaborate memories such as near-death experiences, let alone recovery of consciousness and cognition to report these events. In line with this reasoning, near-death experiences in our study were almost equally distributed between true life-threatening situations and situations that just felt so and in which brain injury was very unlikely to occur. We thus suggest that near-death experiences are not fully terminal or pre-terminal events but rather reflect physiological brain states with functionally and structurally preserved neuronal networks and sudden onset of REM sleep-like features.

An online study such as this one has limitations that should be acknowledged.<sup>5,6</sup> First, complex clinical and ethical notions are impossible to fully implement in a survey form. Second, although we assessed various demographic factors, there are many with potential importance such as religiosity that we did not assess. (Although we did assess religiosity in a previous online survey using the same crowdsourcing platform and found that most participants have a secular background.<sup>19</sup> Also, of note, religiosity appears to be of little importance to near-death experiences.<sup>20</sup>)

On the positive side, the anonymous nature of an online survey limits the influence of psychological bias; there is no incentive to please the investigator by inventing or exaggerating memories. (There was no monetary incentive either, as participants were instructed that their reimbursement was the same irrespective of whether they would report a near-death experience or not). Further, this is the first systematic study on the prevalence of near-death experiences and REM sleep intrusion in an unselected sample of adult lay people. We recruited a much larger sample size than what typically can be achieved with lab-based behavioral testing or mail-based questionnaires. Although we were unable to recruit participants from Africa and Asian participants were underrepresented, this was a truly global sample with

respondents from more than 35 countries on 4 continents, which strengthens the validity and generalizability of our results.

## **CONCLUSIONS**

The prevalence of near-death experiences in the public is around 10%. Whereas age, gender, place of residence, employment status and factual danger of the situation do not appear to influence the frequency with which near-death experiences occur, there is a significant association with REM sleep intrusion. This observation fits well with the notion that despite imminent threat to life, brain physiology must be well-preserved to perceive these fascinating experiences and store them as long-term memories.

## References

1. Greyson B. The near-death experience scale. Construction, reliability, and validity. *J Nerv Ment Dis* [online serial]. 1983;171:369–375. Accessed at: <http://www.ncbi.nlm.nih.gov/pubmed/6854303>. Accessed January 24, 2019.
2. Martial C, Cassol H, Antonopoulos G, et al. Temporality of Features in Near-Death Experience Narratives. *Front Hum Neurosci* [online serial]. 2017;11:311. Accessed at: <http://www.ncbi.nlm.nih.gov/pubmed/28659779>. Accessed January 24, 2019.
3. Cassol H, Pétré B, Degrange S, et al. Qualitative thematic analysis of the phenomenology of near-death experiences. Yi H, editor. *PLoS One* [online serial]. 2018;13:e0193001. Accessed at: <http://www.ncbi.nlm.nih.gov/pubmed/29444184>. Accessed January 24, 2019.
4. Nelson KR, Mattingly M, Lee SA, Schmitt FA. Does the arousal system contribute to near death experience? *Neurology* [online serial]. 2006;66:1003–1009. Accessed at: <http://www.ncbi.nlm.nih.gov/pubmed/16606911>. Accessed January 24, 2019.
5. Peer E, Brandimarte L, Samat S, Acquisti A. Beyond the Turk: Alternative platforms for crowdsourcing behavioral research. *J Exp Soc Psychol* [online serial]. Elsevier Inc.; 2017;70:153–163. Accessed at: <http://dx.doi.org/10.1016/j.jesp.2017.01.006>.
6. Woods AT, Velasco C, Levitan CA, Wan X, Spence C. Conducting perception research over the internet: a tutorial review. *PeerJ* [online serial]. 2015;3:e1058. Accessed at: <https://peerj.com/articles/1058>.
7. Gallup G PW. *Adventures in immortality: A look beyond the threshold of death*. New York, NY: McGraw-Hill.; 1982.
8. Knoblauch H, Schmied I, Schnettler B. Different Kinds of Near-Death Experience: A Report on a Survey of Near-Death Experiences in Germany. *J Near-Death Stud*. 2001;20:15–29.
9. Perera M, Padmasekara G BJ. Prevalence of Near-Death Experiences in Australia. *J Near-Death Stud*. 2005;24:109–116.
10. Fraser H, Parker T, Nakagawa S, Barnett A, Fidler F. Questionable research practices in ecology and evolution. Wicherts JM, editor. *PLoS One* [online serial]. 2018;13:e0200303. Accessed at: <http://www.ncbi.nlm.nih.gov/pubmed/30011289>. Accessed November 19, 2018.
11. Charland-Verville V, Lugo Z, Jourdan J-P, Donneau A-F, Laureys S. Near-Death Experiences in patients with locked-in syndrome: Not always a blissful journey. *Conscious Cogn* [online serial]. 2015;34:28–32. Accessed at: <http://www.ncbi.nlm.nih.gov/pubmed/25837796>. Accessed January 24, 2019.
12. Martial C, Cassol H, Charland-Verville V, Merckelbach H, Laureys S. Fantasy Proneness Correlates With the Intensity of Near-Death Experience. *Front Psychiatry* [online serial]. 2018;9:190. Accessed at: <http://www.ncbi.nlm.nih.gov/pubmed/29930518>. Accessed January 24, 2019.
13. Thonnard M, Charland-Verville V, Brédart S, et al. Characteristics of Near-Death Experiences Memories as Compared to Real and Imagined Events Memories. Valdes-Sosa PA, editor. *PLoS One* [online serial]. 2013;8:e57620. Accessed at: <http://www.ncbi.nlm.nih.gov/pubmed/23544039>. Accessed January 24, 2019.
14. van Lommel P, van Wees R, Meyers V, Elfferich I. Near-death experience in survivors of cardiac arrest: a prospective study in the Netherlands. *Lancet* [online serial]. 2001;358:2039–2045. Accessed at: <http://www.ncbi.nlm.nih.gov/pubmed/11755611>. Accessed January 27, 2019.



15. Kondziella D, Arlien-Soborg P. Diagnostic and therapeutic challenges in narcolepsy-related psychosis. *J. Clin. Psychiatry* 2006. p. 1817–1819.
16. Scammell TE. Narcolepsy. *Campion EW, editor. N Engl J Med [online serial].* 2015;373:2654–2662. Accessed at: <http://www.ncbi.nlm.nih.gov/pubmed/26716917>. Accessed January 27, 2019.
17. Carlson AP, Shuttleworth CW, Major S, Lemale CL, Dreier JP, Hartings JA. Terminal spreading depolarizations causing electrocortical silencing prior to clinical brain death: case report. *J Neurosurg [online serial]. Epub* 2018 Dec 1.:1–7. Accessed at: <http://www.ncbi.nlm.nih.gov/pubmed/30544340>. Accessed January 25, 2019.
18. Dreier JP, Major S, Foreman B, et al. Terminal spreading depolarization and electrical silence in death of human cerebral cortex. *Ann Neurol [online serial].* 2018;83:295–310. Accessed at: <http://www.ncbi.nlm.nih.gov/pubmed/29331091>. Accessed January 25, 2019.
19. Kondziella, D.; Cheung, M.C.; Dutta A. Public Perception of the Vegetative State/Unresponsive Wakefulness Syndrome: A Crowdsourced Study. *Preprints.* 2018;2018120082.
20. Greyson B. Near-death experiences and spirituality. *J Relig Sci.* 2006;41:393–414.

**Table 1**

Questionnaire on REM sleep intrusion and near-death experiences. REM – rapid eye movements; \* in

Questions about REM sleep intrusion (1 point for each positive answer; based on Nelson et al., 2006 <sup>4</sup>)

- Just before falling asleep or just after awakening, have you ever seen objects, things or people that others can't see?
- Just before falling asleep or just after awakening, have you ever heard voices, music or sounds that other people can't hear?
- Have you ever awakened and felt paralyzed or found that you were unable to move?
- Have you ever had abrupt muscle weakness in your legs or knee buckling, or felt sudden muscle weakness in your face or head drop?

Questions about near-death experiences

- Near-death experiences can be defined as any conscious perceptual experience, including emotional, self-related, spiritual and/or mystical experiences, occurring in a person close to death or in situations of intense physical or emotional danger. In plain language - near-death experiences are exceptional experiences that you may have when you are dying or feel as if you were dying. Have you ever had such a near-death experience – either during a true life-threatening event or an event that just felt so?
- Was your near-death experience associated with a true life-threatening event or an event that was not life-threatening but felt so?
- In which situation did you have a near-death experience?
- Have you had more than 1 near-death experience?
- If you wish, please describe your experience as detailed as you can (optional). We are interested to know what you felt and how your experience unfolded over time.

Greyson Near-Death Experience Scale (0-2 points for each answer; based on Greyson, 1983 <sup>1</sup>)

- Did time seem to speed up or slow down?
- Were your thoughts speeded up?
- Did scenes from your past come back to you?
- Did you suddenly seem to understand everything?
- Did you have a feeling of peace or pleasantness? \*
- Did you have a feeling of joy?
- Did you feel a sense of harmony or unity with the universe?
- Did you see, or feel surrounded by, a brilliant light?
- Were your senses more vivid than usual?
- Did you seem to be aware of things going on elsewhere, as if by extrasensory perception or telepathy?
- Did scenes from the future come to you?
- Did you feel separated from your body?
- Did you seem to enter some other, unearthly world?
- Did you seem to encounter a mystical being or presence or hear an unidentifiable voice?
- Did you see deceased or religious spirits?
- Did you come to a border or point of no return?

contrast to the Near-Death Experience Scale, we also inquired about unpleasant experiences

**Table 2**

Demographic data and prevalence of REM sleep intrusion. To adjust for multiple testing, the alpha level was set to 0.01. Significant p values are shown in bold script. N – number of participants; NDE – near-death experiences; REM – rapid eye movements; SD – standard deviation; \* when comparing “No NDE” (n=744) with confirmed near-death experiences with a Greyson NDE Scale score  $\geq 7$  (n=106; see Table 3), this significance is lost (p-value = 0.256).

|                                       | All<br>(n=1034) | No NDE<br>(n=744) | All claimed NDE<br>(n=289) | p-value           |
|---------------------------------------|-----------------|-------------------|----------------------------|-------------------|
| <b>Age – mean <math>\pm</math> SD</b> | 32.7 $\pm$ 11.3 | 33.4 $\pm$ 11.3   | 30.8 $\pm$ 11.1            | <b>0.0006*</b>    |
| <b>Gender – n (%)</b>                 |                 |                   |                            | <b>0.002</b>      |
| Female                                | 607 (59%)       | 461 (62%)         | 145 (50%)                  |                   |
| Male                                  | 424 (41%)       | 282 (38%)         | 142 (49%)                  |                   |
| Other                                 | 3 (0.3%)        | 1 (0.1%)          | 2 (0.7%)                   |                   |
| <b>Continent – n (%)</b>              |                 |                   |                            | <b>0.03</b>       |
| Americas                              | 36 (3.5%)       | 19 (2.6%)         | 17 (5.9%)                  |                   |
| Asia                                  | 13 (1.3%)       | 8 (1.1%)          | 4 (1.4%)                   |                   |
| Europe                                | 938 (91%)       | 687 (92%)         | 251 (87%)                  |                   |
| Oceania                               | 19 (1.8%)       | 14 (1.9%)         | 5 (1.7%)                   |                   |
| Other                                 | 28 (2.7%)       | 16 (2.2%)         | 12 (4.2%)                  |                   |
| <b>Work – n (%)</b>                   |                 |                   |                            | <b>0.34</b>       |
| Full-Time                             | 393 (38%)       | 281 (38%)         | 112 (39%)                  |                   |
| Job seeking                           | 57 (5.5%)       | 41 (5.5%)         | 15 (5.2%)                  |                   |
| Not in paid work                      | 99 (9.6%)       | 75 (10%)          | 24 (8.3%)                  |                   |
| Part-Time                             | 217 (21%)       | 166 (22%)         | 51 (18%)                   |                   |
| Student                               | 174 (17%)       | 116 (16%)         | 58 (20%)                   |                   |
| Other                                 | 94 (9.1%)       | 65 (8.7%)         | 29 (10%)                   |                   |
| <b>REM intrusion – n (%)</b>          |                 |                   |                            | <b>&lt;0.0001</b> |
| $\leq 2$ criteria                     | 829 (80%)       | 637 (86%)         | 192 (66%)                  |                   |
| $\geq 3$ criteria                     | 204 (20%)       | 107 (14%)         | 97 (34%)                   |                   |

**Table 3**

Participants claiming a near-death experience, analyzed according to Greyson Near-Death Experience Scale score. A score of  $\geq 7$  confirms the reported experience as a near-death experience. IQR – interquartile range; n – number of participants; NDE – near-death experience(s); REM – rapid eye movements; SD – standard deviation; significant p-values are shown in bold script; \*excluding participants reporting that their experience was neither pleasant nor unpleasant

|                                               | All claimed NDE<br>(n=289) | Greyson NDE score < 7<br>(n=183) | Greyson NDE score $\geq 7$<br>(n=106) | p-value           |
|-----------------------------------------------|----------------------------|----------------------------------|---------------------------------------|-------------------|
| <b>Greyson NDE score – median (IQR)</b>       | 5 (3;8)                    | 4 (3;5)                          | 9 (8;14)                              |                   |
| Age – mean $\pm$ SD                           | 30.8 $\pm$ 11.1            | 30.0 $\pm$ 10.7                  | 32.0 $\pm$ 11.6                       | 0.14              |
| <b>Gender – n (%)</b>                         |                            |                                  |                                       | <b>0.34</b>       |
| Female                                        | 145 (50%)                  | 98 (54%)                         | 47 (44%)                              |                   |
| Male                                          | 142 (49%)                  | 84 (46%)                         | 58 (55%)                              |                   |
| Other                                         | 2 (0.7%)                   | 1 (0.5%)                         | 1 (0.9%)                              |                   |
| <b>REM intrusion – n (%)</b>                  |                            |                                  |                                       | <b>0.0003</b>     |
| $\leq 2$ criteria                             | 192 (66%)                  | 136 (74%)                        | 56 (53%)                              |                   |
| $\geq 3$ criteria                             | 97 (34%)                   | 47 (26%)                         | 50 (47%)                              |                   |
| <b>Life-threatening event – n (%)</b>         |                            |                                  |                                       | 0.55              |
| Yes                                           | 158 (55%)                  | 103 (56%)                        | 55 (52%)                              |                   |
| No                                            | 131 (45%)                  | 80 (44%)                         | 51 (48%)                              |                   |
| <b>Feelings associated with NDE * – n (%)</b> | (n=230)                    | (n=153)                          | (n=77)                                | <b>&lt;0.0001</b> |
| Unpleasant                                    | 168 (73%)                  | 132 (86%)                        | 36 (47%)                              |                   |
| Pleasant                                      | 62 (27%)                   | 21 (14%)                         | 41 (53%)                              |                   |

**Table 4**

Multivariate logistic regression and odds ratios for having a near-death experience (Greyson Near-Death Experience Scale  $\geq 7$ ). To adjust for multiple testing, the alpha level was set to 0.01. CI – confidence interval; n – number of participants; OR – odds ratio; REM – rapid eye movements; significant p-values are shown in bold script

|                               | <b>OR (CI 95%)</b> | <b>p-value</b> |
|-------------------------------|--------------------|----------------|
| <b>Age</b>                    | 1.01 (0.99-1.04)   | 0.35           |
| <b>Gender</b>                 |                    |                |
| Female (reference)            | 1.00               |                |
| Male                          | 1.58 (0.93-2.69)   | 0.09           |
| Other                         | 1.73 (0.05-59.89)  | 0.74           |
| <b>Work</b>                   |                    |                |
| Full-Time (reference)         | 1.00               |                |
| Part-Time                     | 0.47 (0.22-0.99)   | 0.05           |
| Job seeking                   | 0.59 (0.16-1.93)   | 0.40           |
| Not in paid work              | 0.96 (0.35-2.58)   | 0.94           |
| Student                       | 0.54 (0.25-1.15)   | 0.11           |
| Other                         | 0.45 (0.15-1.3)    | 0.15           |
| <b>Continent</b>              |                    |                |
| Americas (reference)          | 1.00               |                |
| Asia                          | 0 (0-NA)           | 0.98           |
| Europe                        | 0.37 (0.12-1.05)   | 0.06           |
| Oceania                       | 0.59 (0.05-5.79)   | 0.65           |
| Other                         | 0.49 (0.08-2.92)   | 0.43           |
| <b>REM intrusions</b>         |                    |                |
| $\leq 2$ criteria (reference) | 1.00               |                |
| $\geq 3$ criteria             | 2.85 (1.68-4.88)   | <b>0.0001</b>  |
| <b>Life-threatening event</b> |                    |                |
| No (reference)                | 1.00               |                |
| Yes                           | 0.85 (0.5-1.43)    | 0.53           |

**Table 5**

Selected reports from participants with an experience that reached the threshold of  $\geq 7$  points on the Greyson NDE scale to qualify as a near-death experience. Note that the last two comments describe instances that are highly suggestive of REM sleep disturbance, including visual hypnagogic hallucinations and sleep paralysis, rather than the near-death experience both participants reported to have had. Comments are edited for clarity and spelling.

- I was at the beach in Florida, I was 10-11. Suddenly, huge waves started pulling me further and further from the shore. As I was fighting, my life started flashing before me in my head. [...] I felt like my soul was being pulled out of my body. I was floating and was [lifted in the air]. After a few moments I felt like I was in an enormous tunnel of darkness, and at its end there was the brightest white light I have ever seen. I remember that my dead relatives were at the gate, including my maternal grandmother. I don't remember what we talked about. But then I felt that I was sucked out of the tunnel and I fell, crashing into my body again. *Male, 28 years; near-drowning; Greyson NDE Scale score 10; fulfilling 3 of 4 criteria for REM sleep intrusion*
- I encountered a truly out-of-body experience where my eyesight and visual became incredibly abstract. For around an hour I had no sense of self or my surroundings. When my self-awareness returned, I became concerned that I was indeed dying or had died. I eventually became completely lucid, and still to this day I do not understand this experience. *Male, 46 years; drug intoxication; Greyson NDE scale 8; REM 3/4*
- I was very young when I almost drowned. I saw angels, and they were singing the most beautiful music I have ever heard. I was very upset when I was revived. *Female, 57 years; near-drowning; Greyson NDE scale 15; REM 1/4*
- During my first cardiorespiratory arrest I was aware of being outside my body. My partner saw me at the window, calling for help, but at this point I was not breathing. *Female, 35 years; critical illness/cardiac attack; Greyson NDE scale 25; REM 3/4*
- I felt like I just died, and I went to heaven. I heard voices, and I was sure I would not come back to my life. It was weird. I could not control my body. *Female, 37 years; childbirth; Greyson NDE scale 11; REM 3/4*
- It was a very pleasant experience: Intense white light, feelings of overwhelming love. I had a sense of not having done all the things I was meant to do. I heard a nurse repeatedly calling my name and telling me to breathe. I eventually took a breath. It was a very positive experience and has affected my whole life since in a very positive way. *Female, 59 years; childbirth complication; Greyson NDE scale 15; REM 2/4*
- I nearly drowned when I was around 8 years old. I felt total peace. Twenty years later I can still remember how I felt. It was an amazing feeling. *Female, 32 years; near-drowning; Greyson NDE scale 7; REM 2/4*
- I often see characters in my hallway or feel someone else's presence before going to sleep. *Male, 32 years; near-drowning; Greyson NDE scale 11, REM 4/4*
- Sometimes I wake at night, and I can't move. I see strange things, like spirits or demons at my door, and after a while I see them coming beside me. I can't move or talk, and they sit on my chest. It scares the hell out of me! I think that it is a dream, count to 3 and close my eyes. Sometimes this helps. *Female, 28 years; physical violence; NDE 20; REM 4/4*

## Table 6

Selected reports from participants with an experience below the threshold of  $\geq 7$  points on the Greyson NDE

- I felt extreme fear and was certain I would die. At one point I suddenly stopped resting against what was certain to come, and instead a feeling of complete calm and acceptance came over me. I was fully in the moment and had no thoughts of anything else. When I was out of danger, I was shaken but the memory of the "good feeling" was clear. *Female, 50 years; psychological distress without organic disease; Greyson NDE Scale score 3; fulfilling 0 of 4 criteria for REM sleep intrusion*
- I hit the back of my head on a swimming pool springboard. I remember seeing myself outside of my body being helped, while I was unconscious. *Male, 32 years; concussion; Greyson NDE scale 4, REM 2/4*
- During a fire evacuation of an 18-story building, I apparently slept through and didn't evacuate. However, I experienced myself in peace, floating in the hallways and watching the other residents evacuate the building. Talking to them in the following days I could describe who passed me, and what they took with them or were wearing. *Male, 46 years; fire evacuation; Greyson NDE scale 6, REM 1/4*
- I lost a lot of blood during my last childbirth. I felt floaty and weird as if I was about to leave my body. I didn't feel like I was there anymore. *Female, 24 years; childbirth complication; Greyson NDE scale 5; REM 2/4*

scale. Comments are edited for clarity and spelling.



**Figure 1**

Map showing places of residency of survey participants. Using an online crowdsourcing platform, we recruited 1,034 lay people from 35 countries on 4 continents, the majority from Europe and North America

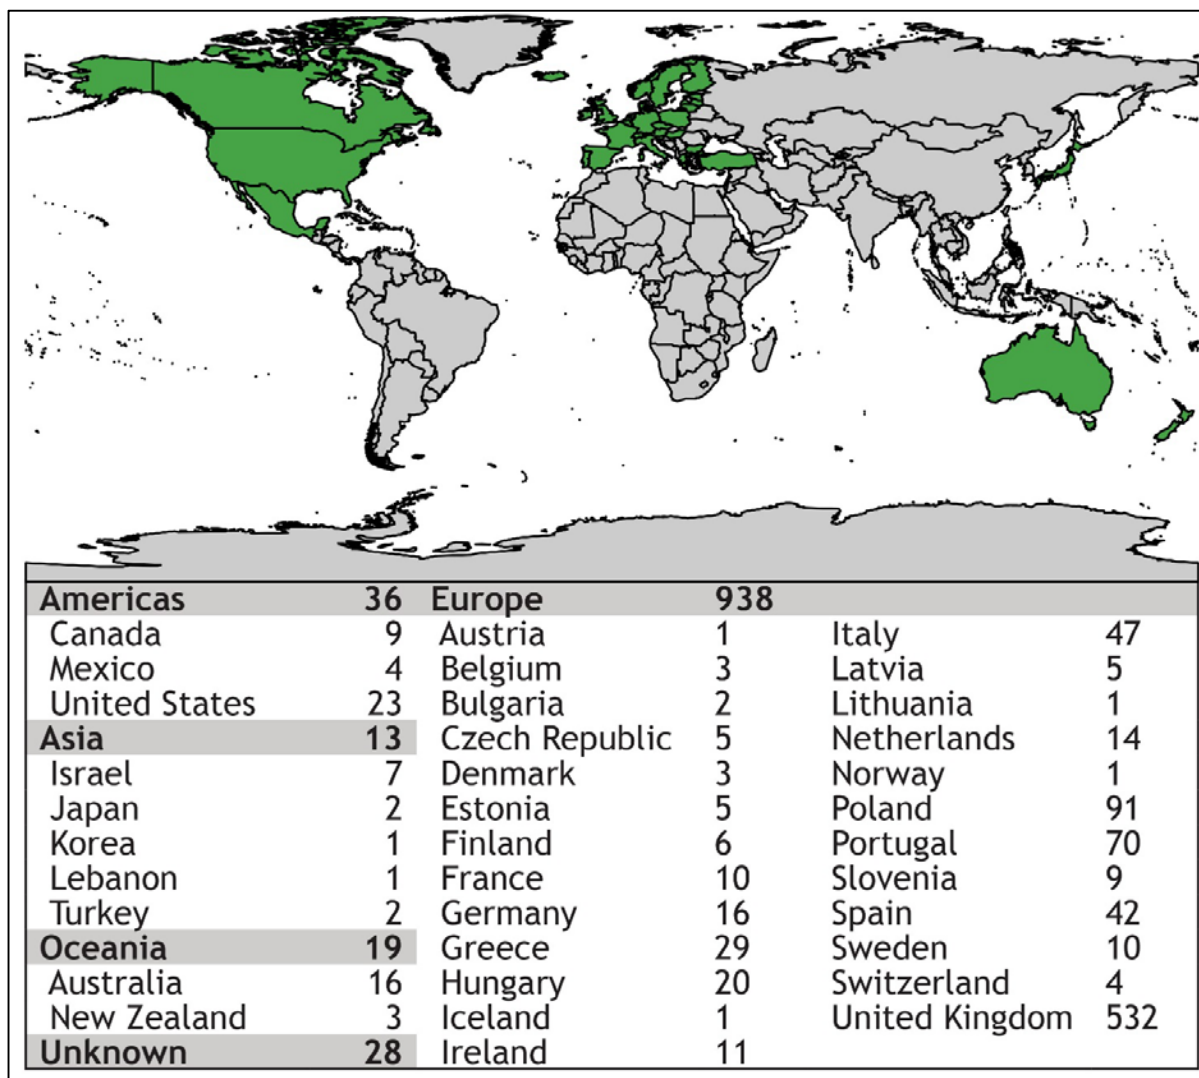

**Figure 2**

Schematic overview of study design. Of 61,719 eligible lay people registered with Prolific Academic (<https://prolific.ac/>; accessed on January 22, 2019), we enrolled 1,034 participants; 106 (10%; CI95% 8.5-12%) of whom reported a near-death experience that fulfilled established criteria (Greyson Near-Death Experience Scale score of 7 or higher). N = number of participants; NDE – near-death experience

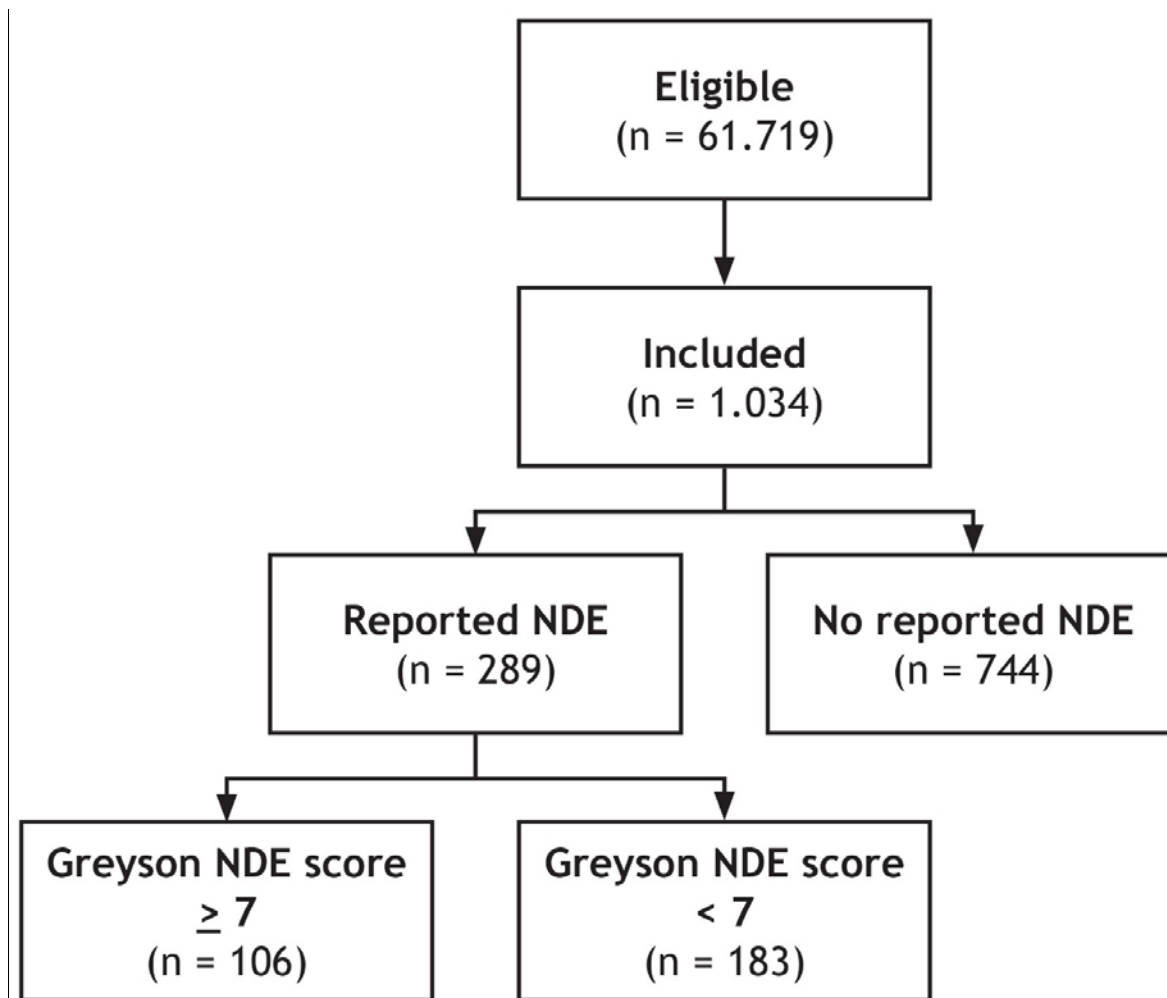

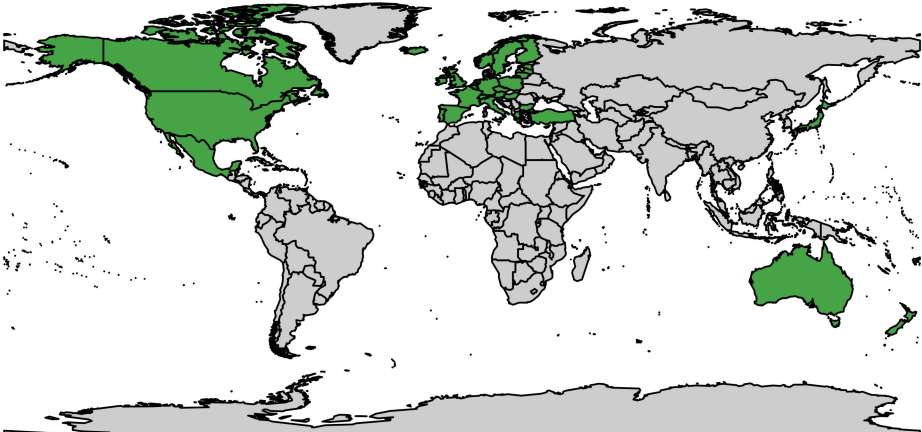

|                 |           |                |            |                |     |
|-----------------|-----------|----------------|------------|----------------|-----|
| <b>Americas</b> | <b>36</b> | <b>Europe</b>  | <b>938</b> |                |     |
| Canada          | 9         | Austria        | 1          | Italy          | 47  |
| Mexico          | 4         | Belgium        | 3          | Latvia         | 5   |
| United States   | 23        | Bulgaria       | 2          | Lithuania      | 1   |
| <b>Asia</b>     | <b>13</b> | Czech Republic | 5          | Netherlands    | 14  |
| Israel          | 7         | Denmark        | 3          | Norway         | 1   |
| Japan           | 2         | Estonia        | 5          | Poland         | 91  |
| Korea           | 1         | Finland        | 6          | Portugal       | 70  |
| Lebanon         | 1         | France         | 10         | Slovenia       | 9   |
| Turkey          | 2         | Germany        | 16         | Spain          | 42  |
| <b>Oceania</b>  | <b>19</b> | Greece         | 29         | Sweden         | 10  |
| Australia       | 16        | Hungary        | 20         | Switzerland    | 4   |
| New Zealand     | 3         | Iceland        | 1          | United Kingdom | 532 |
| <b>Unknown</b>  | <b>28</b> | Ireland        | 11         |                |     |

**Eligible**  
(n = 61.719)

**Included**  
(n = 1.034)

**Reported NDE**  
(n = 289)

**No reported NDE**  
(n = 744)

**Greyson NDE score**  
 $\geq 7$   
(n = 106)

**Greyson NDE score**  
 $< 7$   
(n = 183)
